# Supplementary material
Source: HighWire-hosted journal article supplement (https://jnm.snmjournals.org/highwire/filestream/94532/field_highwire_adjunct_files/0/131100_Supplemental_Data.pdf)
Supplement: 131100_Supplemental_Data.pdf [file 131100_Supplemental_Data.pdf]

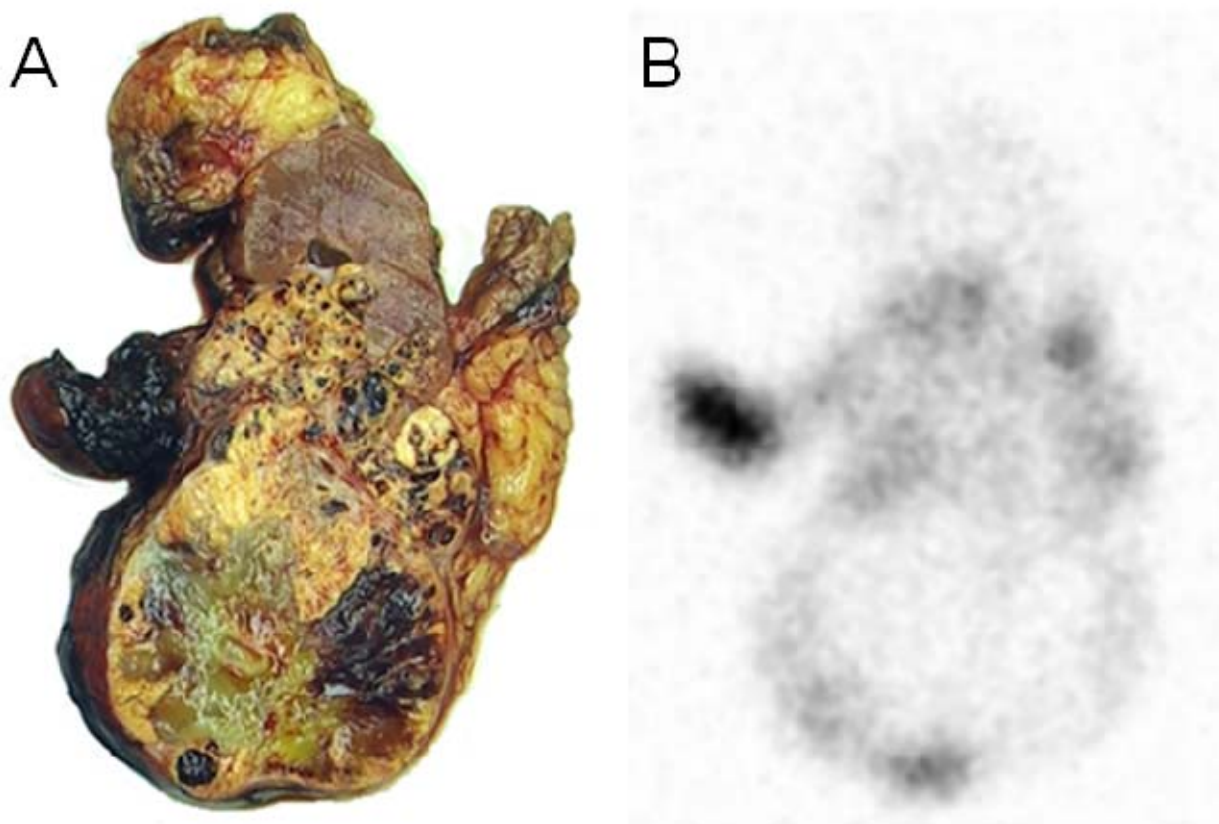

**SUPPLEMENTAL FIGURE 1.** Macroscopic view (A) and scintigraphy (B) of 1 cm surgical lamella of patient 5. This patient presented with a largely necrotic renal mass with extension in the caval vein. Low uptake corresponds to necrotic parts, whereas the highest CAIX expression appears to be located in the caval vein extension.
